# Supplementary material for: Bis(phenolate) N-heterocyclic carbene rare earth metal complexes: synthesis, characterization and applications in the polymerization of n-hexyl isocyanate
Source: Royal Society of Chemistry journal article supplement (doi:10.1039/c5ra16447h), 2015-01-01
Supplement: c5ra16447h1.pdf [file c5ra16447h1.pdf]

## Supporting information

### **Bis(phenolate) N-Heterocyclic Carbene Rare Earth Metal Complexes:**

### **Synthesis, characterization and Applications in the Polymerization of**

### ***n*-Hexyl Isocyanate**

**Page 2.**  $^1\text{H}(^{13}\text{C})$  NMR spectra of L1

**Page 3.**  $^1\text{H}(^{13}\text{C})$  NMR spectra of complex 2

**Page 4.**  $^1\text{H}(^{13}\text{C})$  NMR spectra of complex 4

**Page 5.**  $^1\text{H}$  NMR spectrum of *n*-hexyl isocyanate

**Page 6.** Comparison of  $^1\text{H}$  NMR spectra of two in situ polymerization

**Page 7.** Comparison of  $^{13}\text{C}$  NMR spectra of two in situ polymerization

**Page 8.** The HH COSY spectrum of in situ polymerization

**Page 9.**  $^1\text{H}$ - $^{13}\text{C}$  HSQC spectrum of in situ polymerization

**Page 10.** Crystallographic data for complexes 1, 3

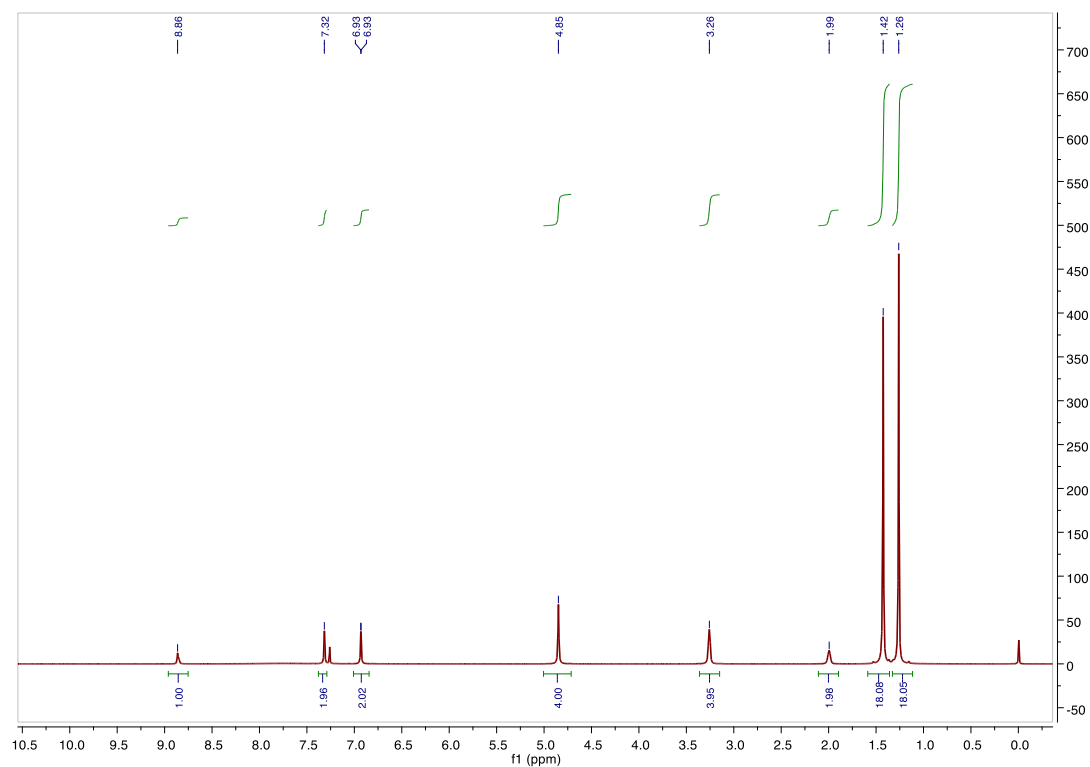

**Fig. s1**  $^1\text{H}$  NMR spectrum of **L1** in  $\text{CDCl}_3$

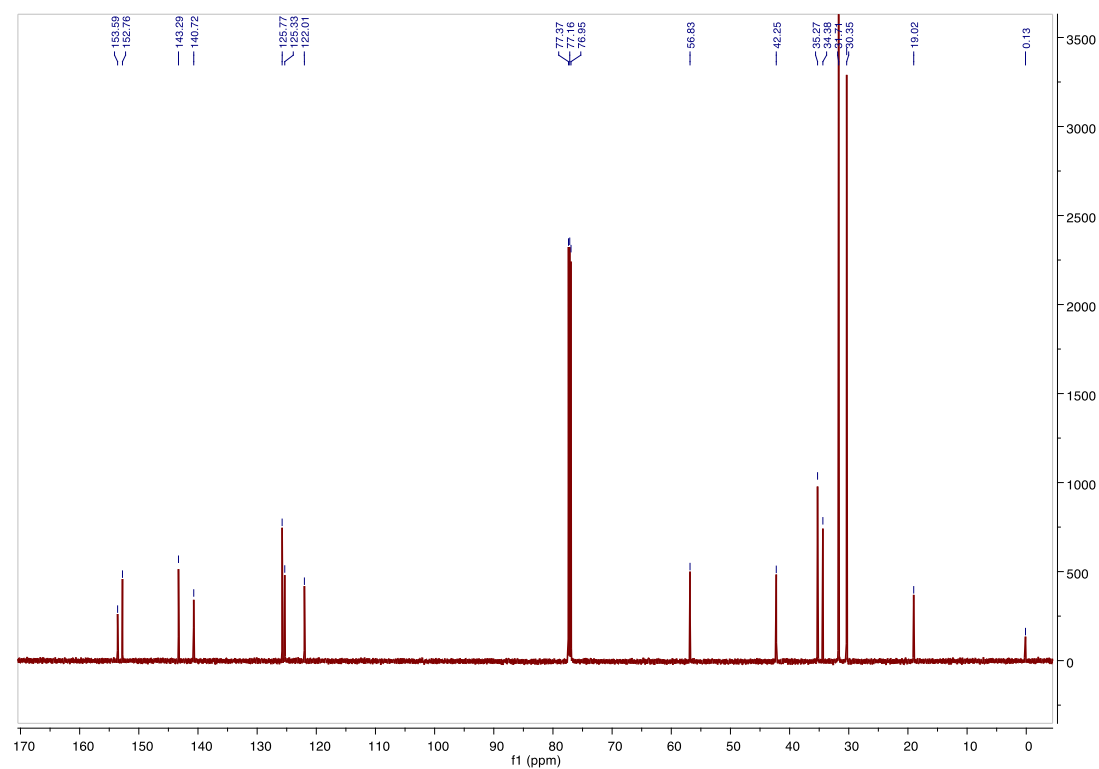

**Fig. s2**  $^{13}\text{C}$  NMR spectrum of **L1** in  $\text{CDCl}_3$

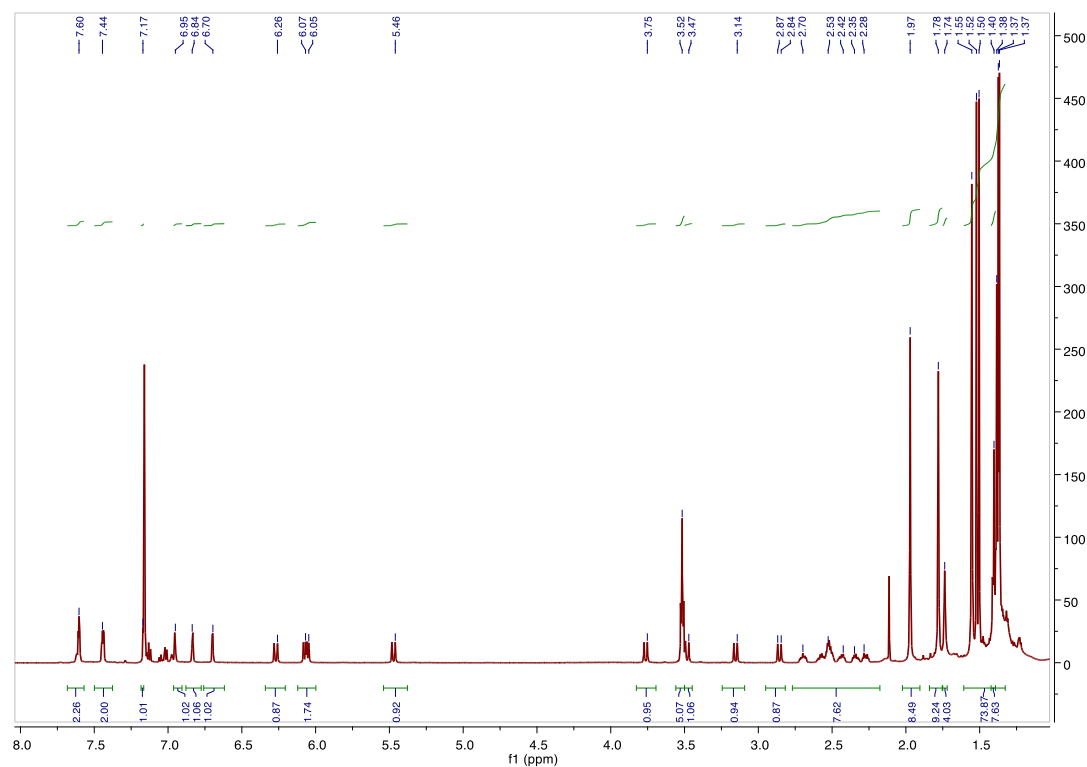

**Fig. s3**  $^1\text{H}$  NMR spectrum of complex **2** in  $\text{C}_6\text{D}_6$

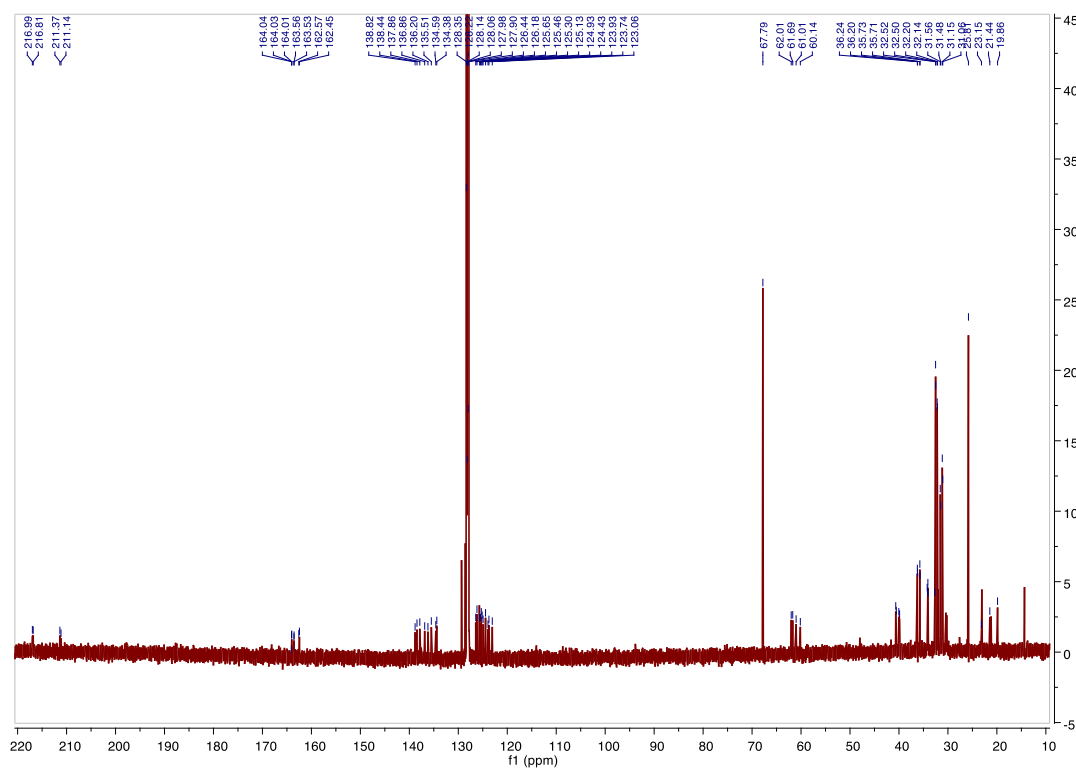

**Fig. s4**  $^{13}\text{C}$  NMR spectrum of complex **2** in  $\text{C}_6\text{D}_6$

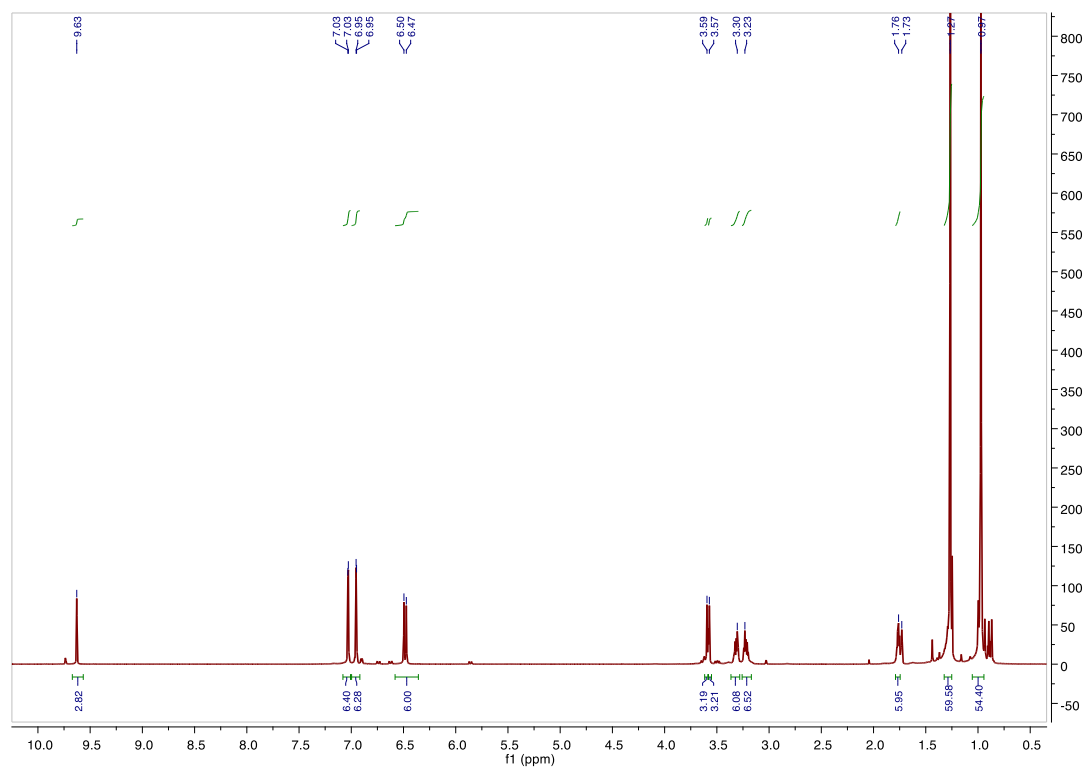

**Fig. s5** <sup>1</sup>H NMR spectrum of complex **4** in THF-*d*<sub>8</sub>

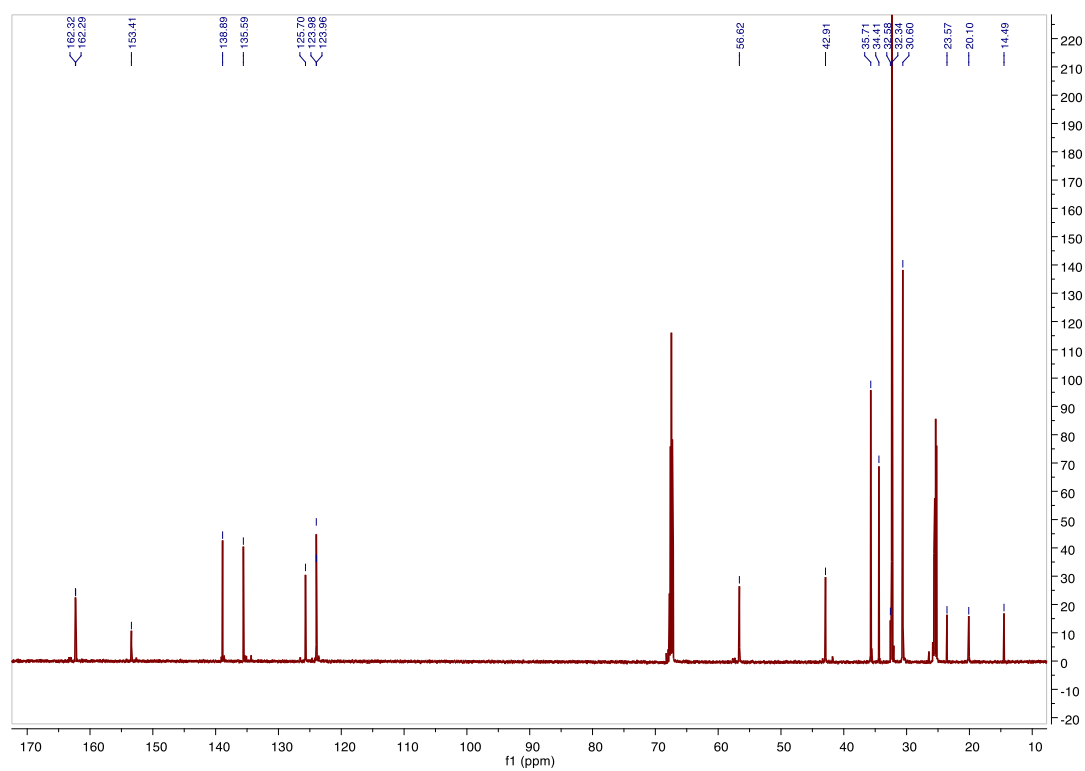

**Fig. s6** <sup>13</sup>C NMR spectrum of complex **4** in THF-*d*<sub>8</sub>

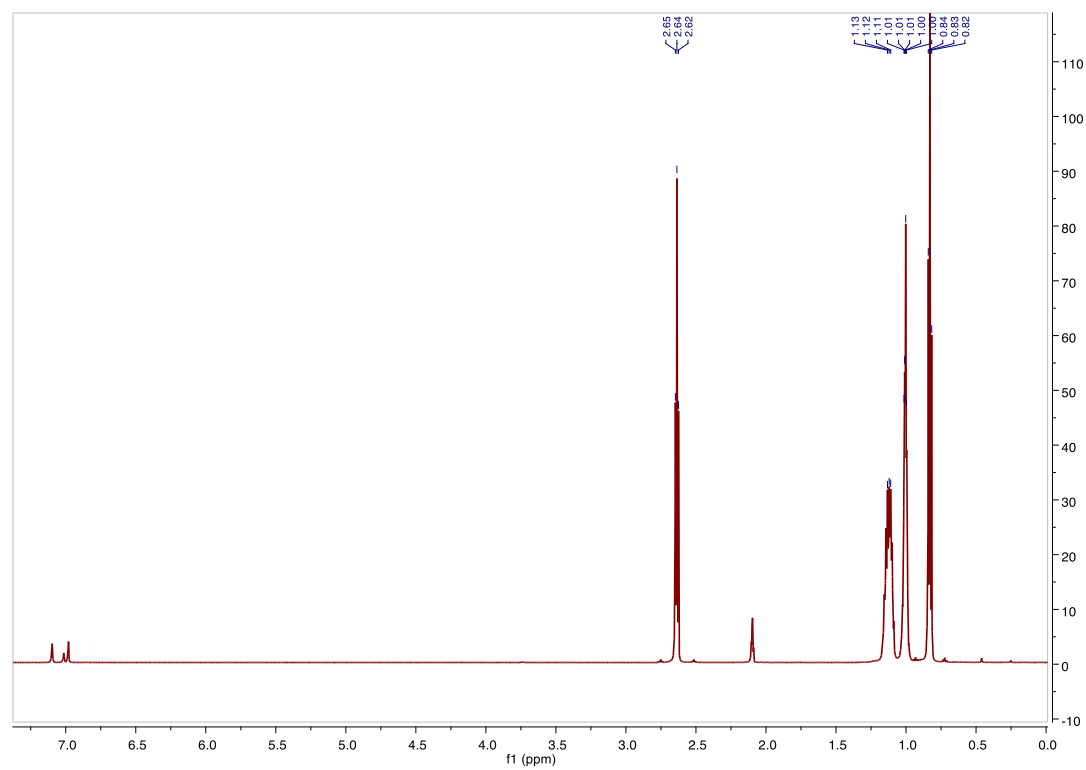

**Fig. s7**  $^1\text{H}$  NMR spectrum of *n*-hexyl isocyanate in  $\text{toluene-}d_8$

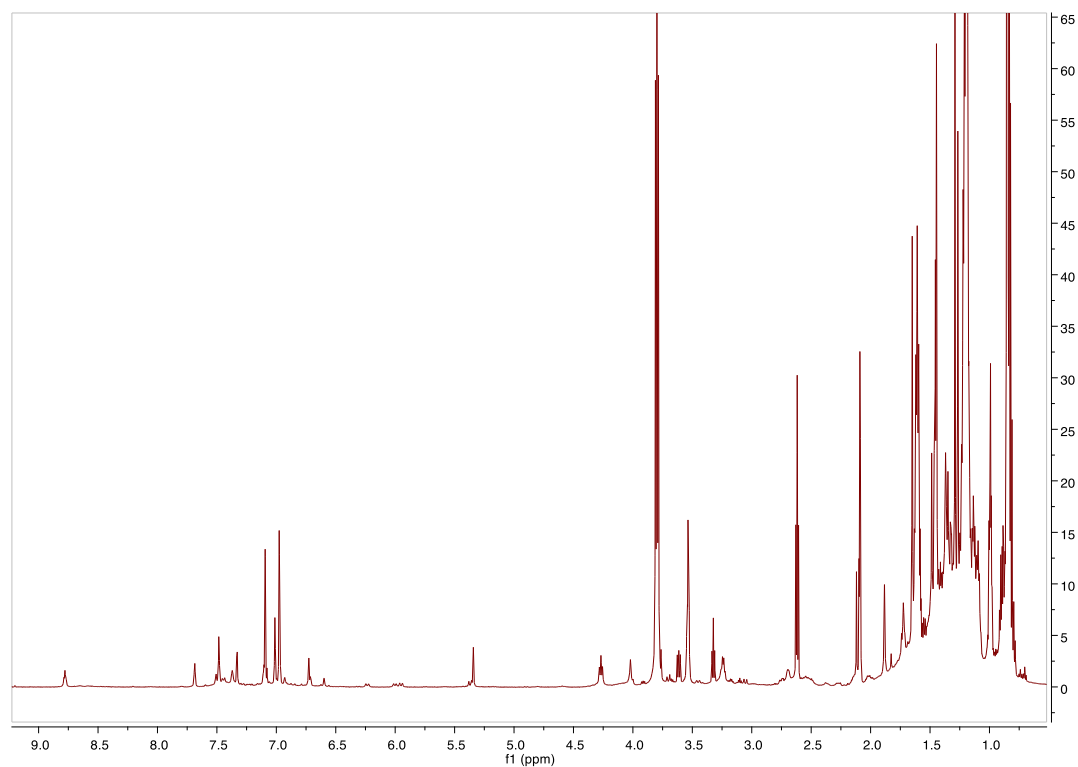

**Fig. s8**  $^1\text{H}$  NMR spectrum of in situ polymerization in toluene- $d_8$  with complex **2** nearly all participated in the initiation

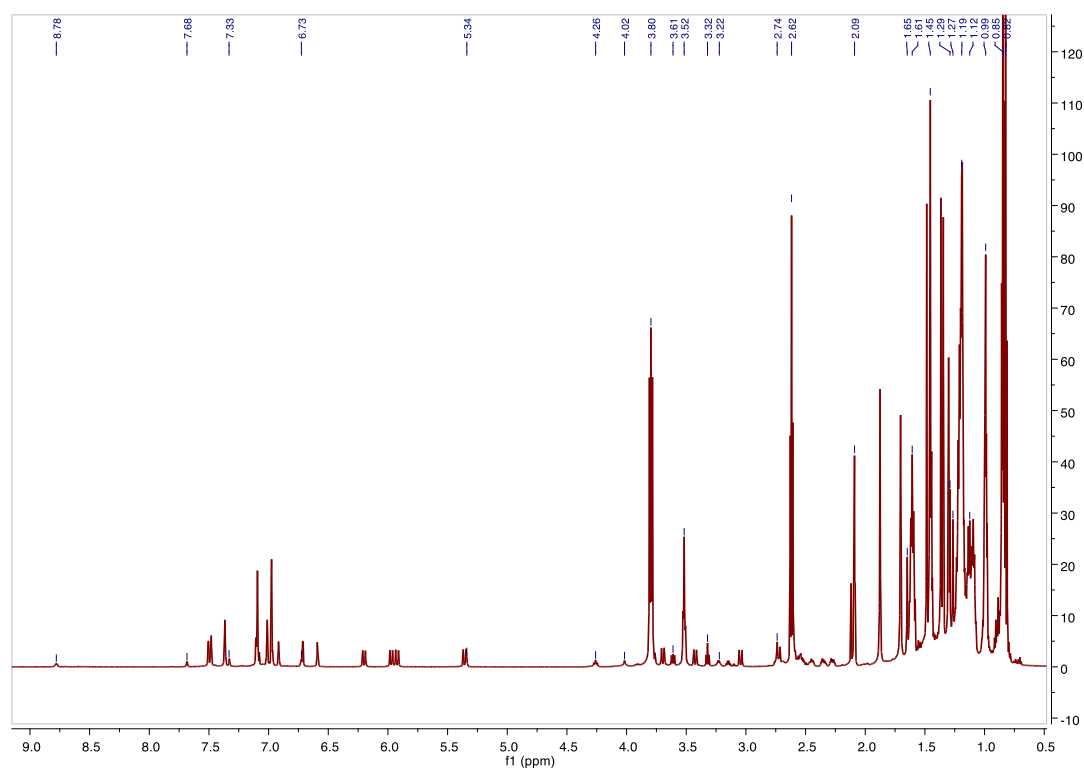

**Fig. s9**  $^1\text{H}$  NMR spectrum of in situ polymerization in toluene- $d_8$  with complex **2** a small amount participated in the initiation

The peak picked are the same with the peak shown in **Fig. s8**, and the remaining peaks represent the unreacted hydrogens of complex **2**, which can be identified by comparison with **Fig. s3**.

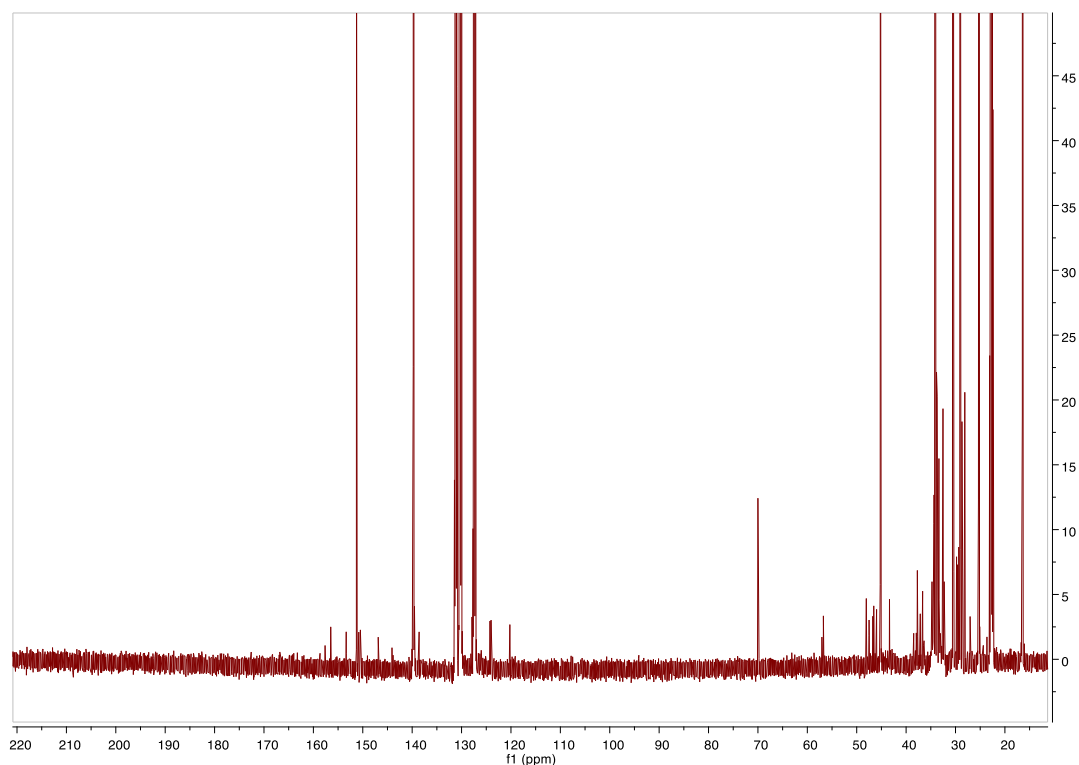

**Fig. s10**  $^{13}\text{C}$  NMR spectrum of in situ polymerization in toluene- $d_8$  with complex **2** nearly all participated in the initiation

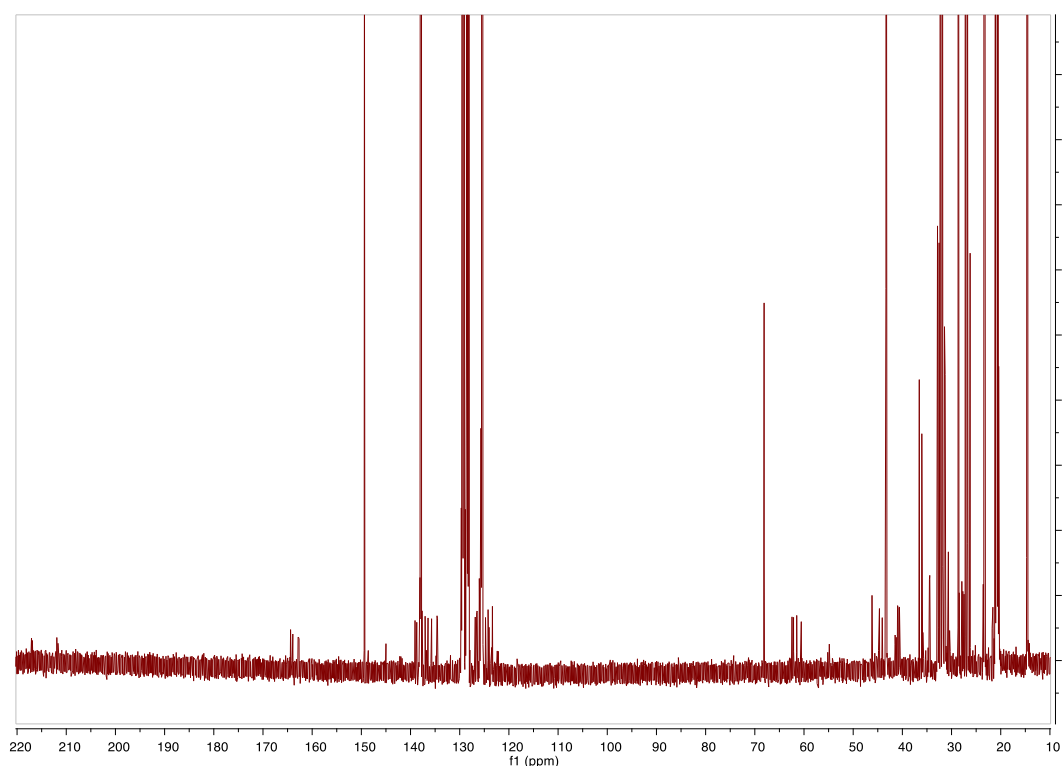

**Fig. s11**  $^{13}\text{C}$  NMR spectrum of in situ polymerization in toluene- $d_8$  with complex **2** a small amount participated in the initiation

It can be seen that after initiation, the signals of carbon on methane  $\text{ArCH}_2\text{N}$  move up field (from  $\delta$  62.41, 62.13, 61.47, 60.56 to 55.17, 54.87). the signals of carbon on the NHC ring  $\text{NCH}_2\text{CH}_2\text{CH}_2\text{N}$  move upfield (from  $\delta$  40.96, 40.84, 40.59, 40.48 to 36.05, 35.84, 35.76, 35.25). The enhanced intensity of the signals at  $\delta$  45.62, 44.87 represent the chiral carbon on the deprotonated monomer. The high resonance  $\text{C}_{\text{carbene}}$  at  $\delta$  211.93, 216.94 disappear in **Fig. s10**. And this further confirms the bond breakage of NHC and yttrium.

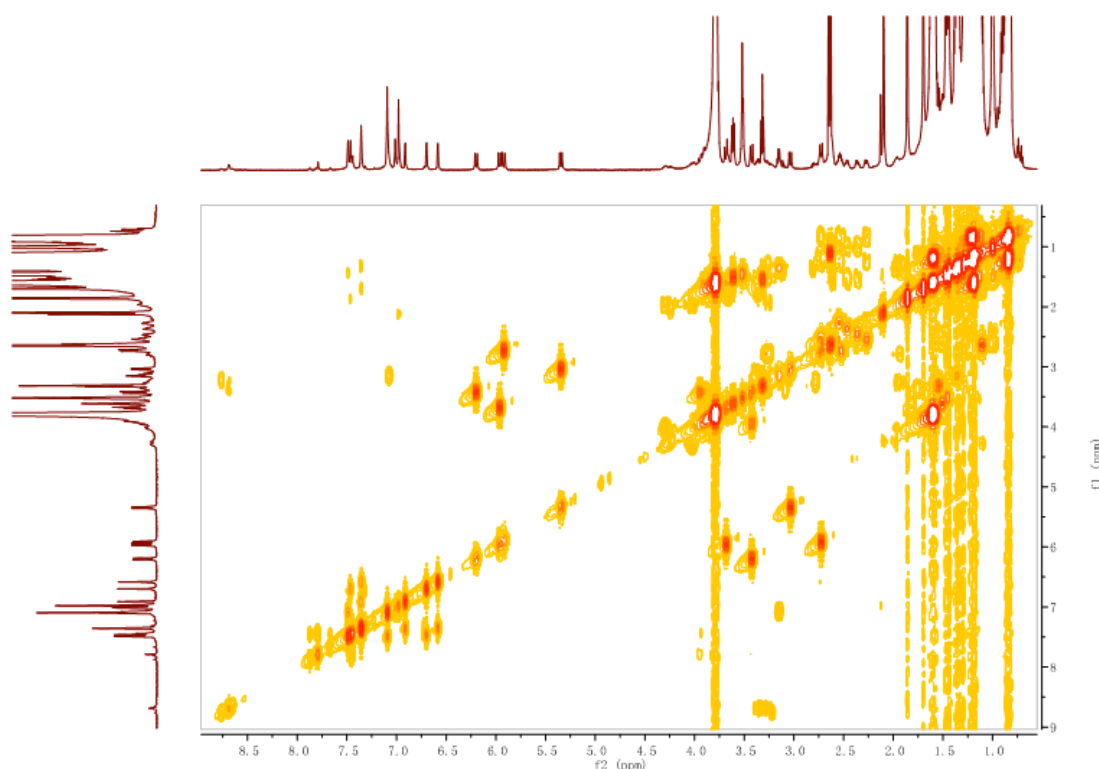

**Fig. s12**  $^1\text{H}$ - $^1\text{H}$  COSY spectrum of in situ polymerization in toluene- $d_8$  with complex **2** a small amount participated in the initiation (overview).

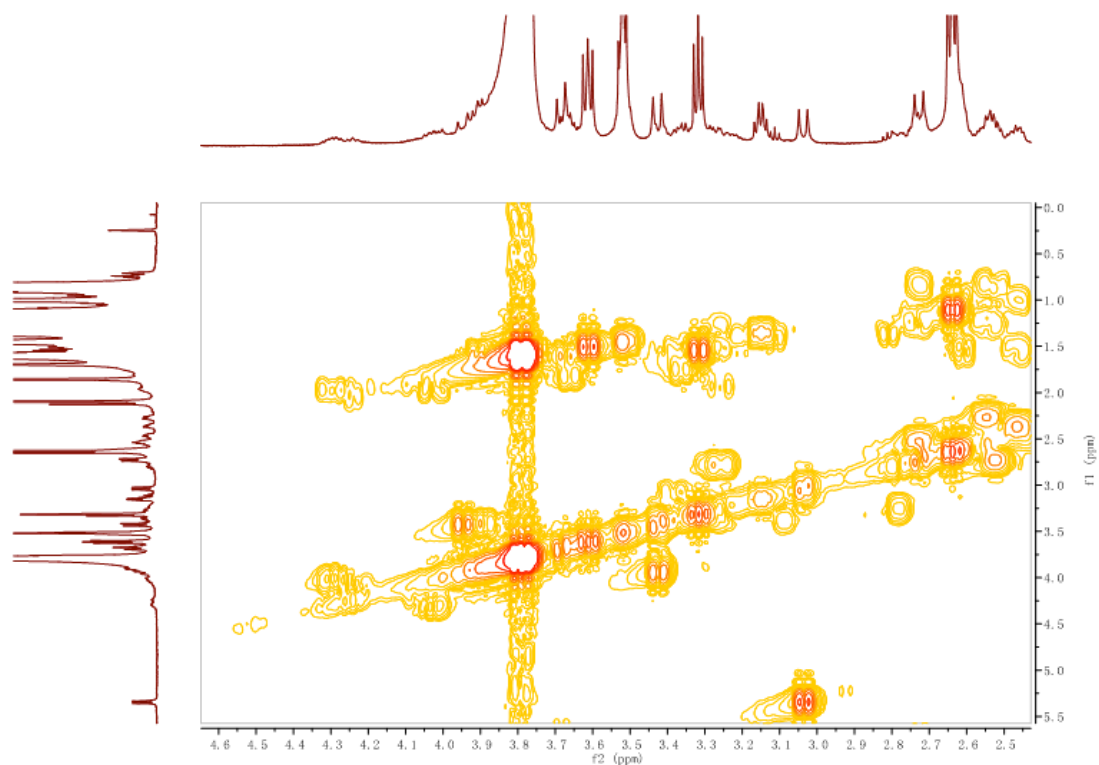

**Fig. s13**  $^1\text{H}$ - $^1\text{H}$  COSY spectrum of in situ polymerization in toluene- $d_8$  with complex **2** a small amount participated in the initiation (part).

After hydrogen-abstraction, the hydrogen left  $\text{H}^i$  on the chiral carbon occurred at  $\delta$  4.26, 4.02 and the methene signals were coupled with protons  $\text{H}^j$  on adjacent carbon. The signal at  $\delta$  3.22  $\text{H}^k$  was coupled with  $\text{H}^i$  and  $\text{H}^j$  on the  $^1\text{H}$ - $^1\text{H}$  COSY spectrum.



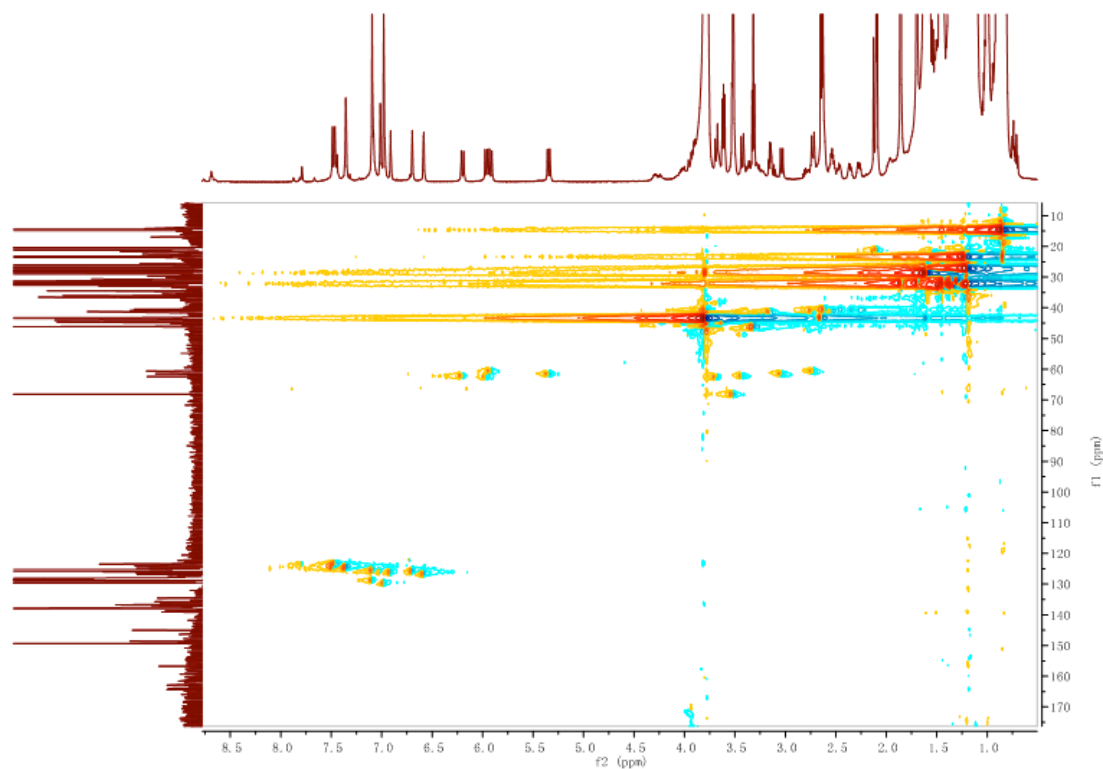

**Fig. s14**  $^1\text{H}$ - $^{13}\text{C}$  HSQC spectrum of in situ polymerization in toluene- $d_8$  with complex **2** a small amount participated in the initiation (overview).

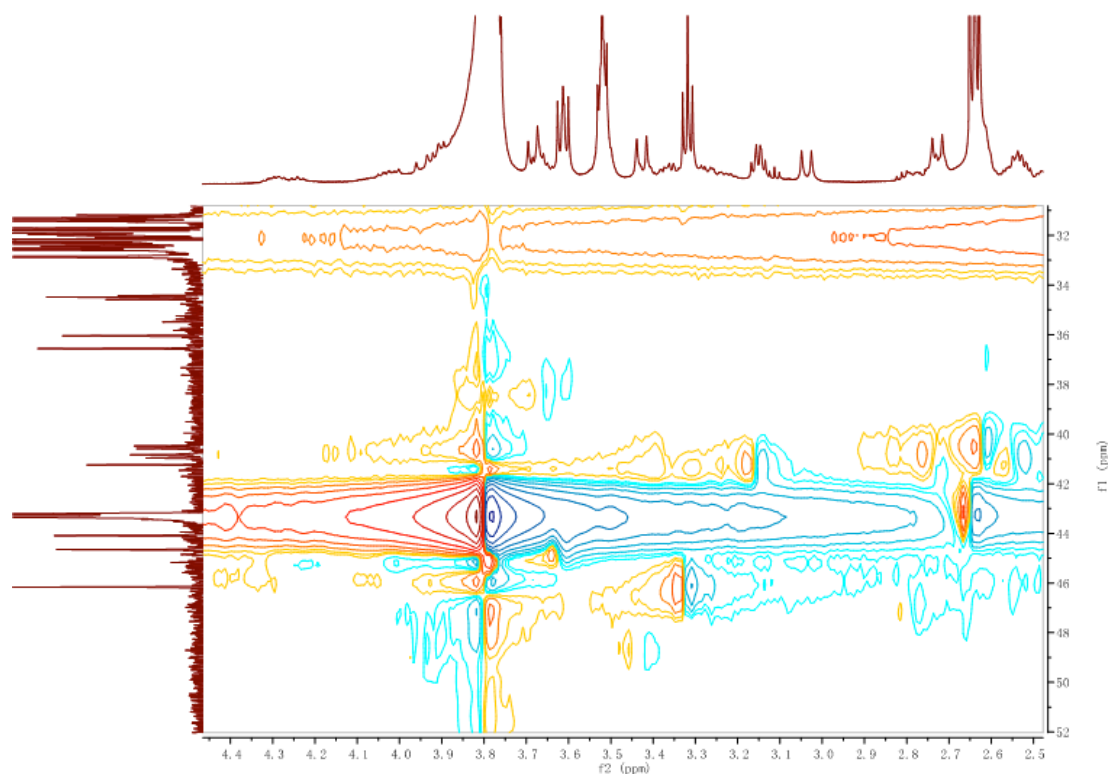

**Fig. s14**  $^1\text{H}$ - $^{13}\text{C}$  HSQC spectrum of in situ polymerization in toluene- $d_8$  with complex **2** a small amount participated in the initiation (part).

The signals of the chiral carbon can be assigned to  $\delta$  45.62, 44.87. The  $\text{H}^i$  was coupled with the chiral carbon.

**Table S1** Crystallographic data for complexes **1**, **3**

| Compound reference                                                                     | <b>1</b>                                                          | <b>3</b>                                                                                        |
|----------------------------------------------------------------------------------------|-------------------------------------------------------------------|-------------------------------------------------------------------------------------------------|
| Chemical formula                                                                       | C <sub>72</sub> H <sub>108</sub> N <sub>4</sub> KNdO <sub>5</sub> | C <sub>102</sub> H <sub>153</sub> O <sub>6</sub> N <sub>6</sub> Cl <sub>3</sub> Sm <sub>2</sub> |
| Formula Mass                                                                           | 1292.96                                                           | 1966.38                                                                                         |
| Crystal system                                                                         | Monoclinic                                                        | triclinic                                                                                       |
| a/Å                                                                                    | 15.5124(5)                                                        | 18.2347(5)                                                                                      |
| b/Å                                                                                    | 18.0557(6)                                                        | 18.5751(4)                                                                                      |
| c/Å                                                                                    | 26.2035(9)                                                        | 21.1019(5)                                                                                      |
| $\alpha$ /°                                                                            | 90.00                                                             | 75.4933(18)                                                                                     |
| $\beta$ /°                                                                             | 100.873(3)                                                        | 65.628(2)                                                                                       |
| $\gamma$ /°                                                                            | 90.00                                                             | 76.527(2)                                                                                       |
| Unit cell volume/Å <sup>3</sup>                                                        | 7207.5(4)                                                         | 6234.5(3)                                                                                       |
| Temperature/K                                                                          | 170                                                               | 170                                                                                             |
| Space group                                                                            | <i>P</i> 2 <sub>1</sub> / <i>n</i>                                | P -1                                                                                            |
| No. of formula units per unit cell, <i>Z</i>                                           | 4                                                                 | 2                                                                                               |
| Absorption coefficient, $\mu$ /mm <sup>-1</sup>                                        | 0.826                                                             | 1.040                                                                                           |
| No. of reflections measured                                                            | 31743                                                             | 40518                                                                                           |
| <i>R</i> <sub>int</sub>                                                                | 0.0456                                                            | 0.0374                                                                                          |
| Final <i>R</i> <sub>I</sub> values ( <i>I</i> > 2 $\sigma$ ( <i>I</i> ))               | 0.0414                                                            | 0.0465                                                                                          |
| Final <i>wR</i> ( <i>F</i> <sup>2</sup> ) values ( <i>I</i> > 2 $\sigma$ ( <i>I</i> )) | 0.0834                                                            | 0.1240                                                                                          |
| Final <i>R</i> <sub>I</sub> values (all data)                                          | 0.0703                                                            | 0.0673                                                                                          |
| Final <i>wR</i> ( <i>F</i> <sup>2</sup> ) values (all data)                            | 0.0953                                                            | 0.1355                                                                                          |
| Goodness of fit on <i>F</i> <sup>2</sup>                                               | 1.051                                                             | 1.078                                                                                           |
| CCDC number                                                                            | 1407874                                                           | 994627                                                                                          |
